# Supplementary material for: Subjective Cognitive Complaints and Objective Cognitive Impairment in Parkinson's Disease
Source: PubMed Central journal article supplement — J Clin Neurol. 2017 Oct 31;14(1):16–21. doi: 10.3988/jcn.2018.14.1.16 (PMC5765251; doi:10.3988/jcn.2018.14.1.16), 2017-10-31
Supplement: jcn-14-16-s001.pdf [file jcn-14-16-s001.pdf]

**Supplementary Table 1.** Neuropsychological performance of subjects classified according to cognitive status

|                         | <b>CN (n=148)</b> | <b>MCI (n=71)</b> | <b>D (n=31)</b> | <b>p-value</b> | <b>Significant comparison</b> |
|-------------------------|-------------------|-------------------|-----------------|----------------|-------------------------------|
| K-MMSE                  | 27.8±1.7          | 26.1±2.1          | 20.2±3.7        | <0.001         | CN>MCI>D                      |
| K-MoCA                  | 24.9±3.2          | 22.1±3.4          | 14.2±4.3        | <0.001         | CN>MCI>D                      |
| Forward digit span      | 6.6±1.3           | 5.8±1.2           | 4.9±1.2         | <0.001         | CN>MCI>D                      |
| TMT-A (seconds)         | 26.5±13.3         | 39.8±24.4         | 105.5±99.3      | <0.001         | CN, MCI<D                     |
| K-BNT                   | 49.5±6.3          | 41.6±7.8          | 31.0±10.6       | <0.001         | CN>MCI>D                      |
| Word similarity         | 15.7±4.8          | 12.0±4.2          | 8.3±4.3         | <0.001         | CN>MCI>D                      |
| Copying of RCFT         | 33.5±2.3          | 29.5±5.5          | 18.7±8.1        | <0.001         | CN>MCI>D                      |
| Clock copying (CLOX2)   | 14.7±0.6          | 13.4±1.6          | 11.2±3.4        | <0.001         | CN>MCI>D                      |
| Delayed recall of SVLT  | 6.4±2.5           | 3.2±2.6           | 1.7±1.7         | <0.001         | CN>MCI>D                      |
| Delayed recall of RCFT  | 16.1±6.5          | 9.8±5.3           | 3.4±3.2         | <0.001         | CN>MCI>D                      |
| Semantic fluency-animal | 16.3±4.4          | 13.3±3.8          | 7.7±3.0         | <0.001         | CN>MCI>D                      |
| Clock drawing test      | 9.8±0.5           | 9.2±1.0           | 7.3±2.6         | <0.001         | CN>MCI>D                      |
| CCI score               | 3.3±2.3           | 4.3±2.8           | 6.5±2.2         | <0.001         | CN<MCI<D                      |

Data are expressed as mean±SD.

CCI: Cognitive Complaint Interview, CN: cognitively normal, D: dementia, K-BNT: Korean version of the Boston Naming Test, K-MMSE: Korean version of the Mini Mental State Examination, K-MoCA: Korean version of the Montreal Cognitive Assessment, MCI: mild cognitive impairment, RCFT: Rey-Osterrieth complex figure test, SVLT: Seoul verbal learning test, TMT-A: trail-making test type A.
